# Supplementary material for: Bispecific GPC3/PD-1 CAR-T cells for the treatment of HCC
Source: PubMed Central journal article supplement — Int J Oncol. 2023 Mar 10;62(4):53. doi: 10.3892/ijo.2023.5501 (PMC10019756; doi:10.3892/ijo.2023.5501), 2023-03-10

Figure S1. GPC3 and PD-L1 are expressed in HCC cell lines. (A) The expression of GPC3 and PD-L1 in SNU182, HCCLM3, HuH7 and SNU423 cells was detected using western blotting. (B) GPC3 expression was knocked down in HuH7 cells via GPC3 shRNA transfection. Data are presented as the mean  $\pm$  SD. \*\*\* $P$ <0.001. GPC3, glypican-3; PD-L1, programmed death ligand 1; HCC, hepatocellular carcinoma.

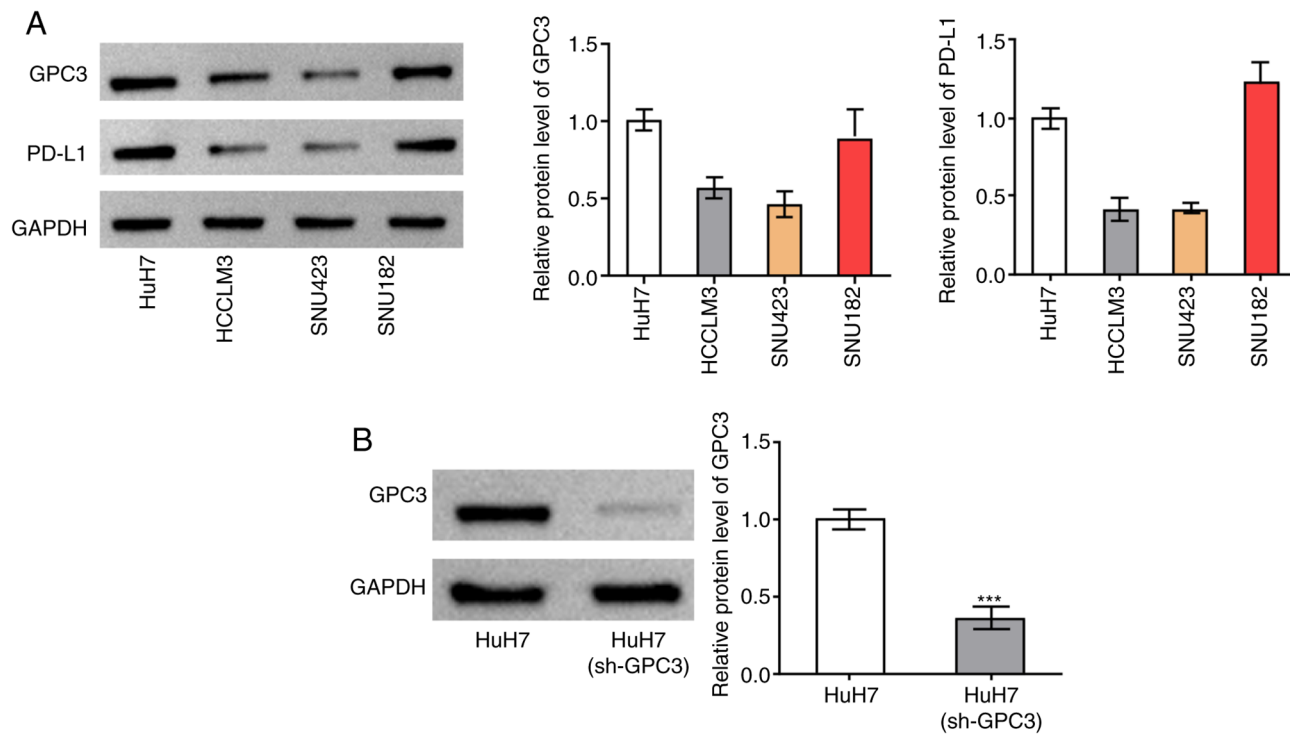

Supplement: Supplementary_Data.pdf [file Supplementary_Data.pdf]
